# Supplementary material
Source: publisher figshare collection journal article supplement (https://frontiersin.figshare.com/ndownloader/files/30595317)
Supplement: Supplementary file [file 30595317]

# Supplementary Material

## 1 SUPPLEMENTARY TABLES

**Table S1.** Summary of the performance on automated ground truth of models trained on the OASIS data. *Se*: Sensitivity, *Pr*: Precision. Highlighted results indicate that median values are larger ( $P50$ : Wilcoxon,  $p < 0.05$ ).

| Tissues | OASIS - test set     |              |                         |           | MS Dataset - test set |              |                         |              |
|---------|----------------------|--------------|-------------------------|-----------|-----------------------|--------------|-------------------------|--------------|
|         | CNN <sub>OASIS</sub> |              | CNN <sub>OASIS-DA</sub> |           | CNN <sub>OASIS</sub>  |              | CNN <sub>OASIS-DA</sub> |              |
|         | <i>Se</i>            | <i>Pr</i>    | <i>Se</i>               | <i>Pr</i> | <i>Se</i>             | <i>Pr</i>    | <i>Se</i>               | <i>Pr</i>    |
| WM      | 0.931                | <b>0.958</b> | 0.933                   | 0.948     | <b>0.932</b>          | 0.863        | 0.900                   | <b>0.922</b> |
| GM      | <b>0.879</b>         | 0.933        | 0.868                   | 0.934     | 0.860                 | 0.863        | <b>0.881</b>            | <b>0.875</b> |
| LV      | 0.968                | 0.967        | 0.965                   | 0.957     | 0.893                 | <b>0.984</b> | <b>0.965</b>            | 0.944        |
| Tha     | 0.963                | <b>0.943</b> | <b>0.972</b>            | 0.933     | 0.935                 | 0.924        | <b>0.952</b>            | 0.929        |
| HC      | 0.945                | <b>0.878</b> | <b>0.955</b>            | 0.867     | 0.872                 | <b>0.903</b> | <b>0.943</b>            | 0.851        |
| CdN     | 0.944                | <b>0.923</b> | <b>0.954</b>            | 0.907     | 0.871                 | <b>0.955</b> | <b>0.920</b>            | 0.925        |
| Pu      | 0.950                | 0.920        | 0.948                   | 0.917     | 0.896                 | <b>0.917</b> | <b>0.940</b>            | 0.903        |
| GP      | 0.944                | <b>0.887</b> | <b>0.957</b>            | 0.865     | 0.813                 | <b>0.936</b> | <b>0.912</b>            | 0.894        |
| ALL     | 0.941                | <b>0.926</b> | <b>0.944</b>            | 0.916     | 0.884                 | <b>0.91</b>  | <b>0.927</b>            | 0.906        |

**Table S2.** Summary of the performance on automated ground truth of models trained on the MS dataset. *Se*: Sensitivity, *Pr*: Precision. Highlighted results indicate that median values are larger ( $P50$ : Wilcoxon,  $p < 0.05$ ).

| Tissues | OASIS - test set  |              |                      |              | MS Dataset - test set |              |                      |              |
|---------|-------------------|--------------|----------------------|--------------|-----------------------|--------------|----------------------|--------------|
|         | CNN <sub>MS</sub> |              | CNN <sub>MS-DA</sub> |              | CNN <sub>MS</sub>     |              | CNN <sub>MS-DA</sub> |              |
|         | <i>Se</i>         | <i>Pr</i>    | <i>Se</i>            | <i>Pr</i>    | <i>Se</i>             | <i>Pr</i>    | <i>Se</i>            | <i>Pr</i>    |
| WM      | 0.905             | <b>0.980</b> | <b>0.945</b>         | 0.959        | 0.923                 | 0.947        | <b>0.934</b>         | <b>0.953</b> |
| GM      | 0.801             | 0.913        | <b>0.828</b>         | <b>0.935</b> | 0.839                 | 0.921        | <b>0.872</b>         | 0.927        |
| LV      | <b>0.984</b>      | 0.916        | 0.967                | <b>0.944</b> | 0.956                 | <b>0.964</b> | <b>0.965</b>         | 0.959        |
| Tha     | 0.962             | 0.940        | 0.958                | 0.941        | <b>0.972</b>          | 0.921        | 0.959                | <b>0.945</b> |
| HC      | 0.943             | 0.869        | 0.942                | <b>0.882</b> | 0.929                 | 0.874        | <b>0.950</b>         | 0.868        |
| CdN     | 0.946             | 0.898        | 0.950                | 0.901        | <b>0.958</b>          | 0.887        | 0.946                | <b>0.925</b> |
| Pu      | 0.913             | <b>0.925</b> | <b>0.930</b>         | 0.918        | 0.944                 | 0.910        | <b>0.955</b>         | 0.912        |
| GP      | 0.956             | 0.840        | 0.952                | 0.849        | <b>0.968</b>          | 0.824        | 0.959                | <b>0.865</b> |
| ALL     | 0.926             | 0.910        | <b>0.934</b>         | <b>0.916</b> | 0.936                 | 0.906        | <b>0.943</b>         | <b>0.919</b> |
